# Supplementary material for: A solar-charged photoelectrochemical wastewater fuel cell for efficient and sustainable hydrogen production
Source: Royal Society of Chemistry journal article supplement (doi:10.1039/c7ta08112j), 2017-01-01
Supplement: c7ta08112j1.pdf [file c7ta08112j1.pdf]

## Supplementary Information

### **Solar-charged Photoelectrochemical Wastewater Fuel Cell for Efficient and Sustainable Hydrogen Production**

*Zhaoyu Zhou, ‡<sup>a</sup> Zhongyi Wu, ‡<sup>a</sup> Qunjie Xu\*<sup>b</sup> and Guohua Zhao\*<sup>a</sup>*

<sup>a</sup> School of Chemical Science and Engineering, Shanghai Key Lab of Chemical Assessment and Sustainability, Tongji University, Shanghai, 200092, People's Republic of China.

<sup>b</sup> Shanghai Key Laboratory of Materials Protection and Advanced Materials in Electric Power, Shanghai University of Electric Power, Shanghai 200090, China.

E-mail address: g.zhao@tongji.edu.cn

E-mail address: xuqunjie@shiep.edu.cn

‡These authors are co-first authors and contributed equally to this work.

## Calculation of photocarrier density

The photocarrier density was calculated by the equation

$$\frac{1}{C^2} = \frac{2}{NDe\epsilon\epsilon_0} \left( E_S - E_{FB} - \frac{kT}{e} \right) \quad (1)$$

$$N_D = \frac{2}{e\epsilon_0\epsilon} \left( \frac{dE}{d\left(\frac{1}{C^2}\right)} \right) \quad (2)$$

where, C is the space charge capacity of the semiconductor material, e is the element charge quantity ( $1.6 \times 10^{-19}$  C), ND is the carrier density,  $\epsilon_0$  is the vacuum dielectric constant ( $8.86 \times 10^{-12}$  F m<sup>-1</sup>),  $\epsilon$  is the relative permittivity of the WO<sub>3</sub> nanostructures (a value of 50 has been assumed for the WO<sub>3</sub>), E<sub>S</sub> is the applied potential, E<sub>FB</sub> is the flat band potential, T is absolute temperature and k is Boltzmann's constant ( $1.38 \times 10^{-23}$  J K<sup>-1</sup>). Thus, the equation of ND can be described as follow:

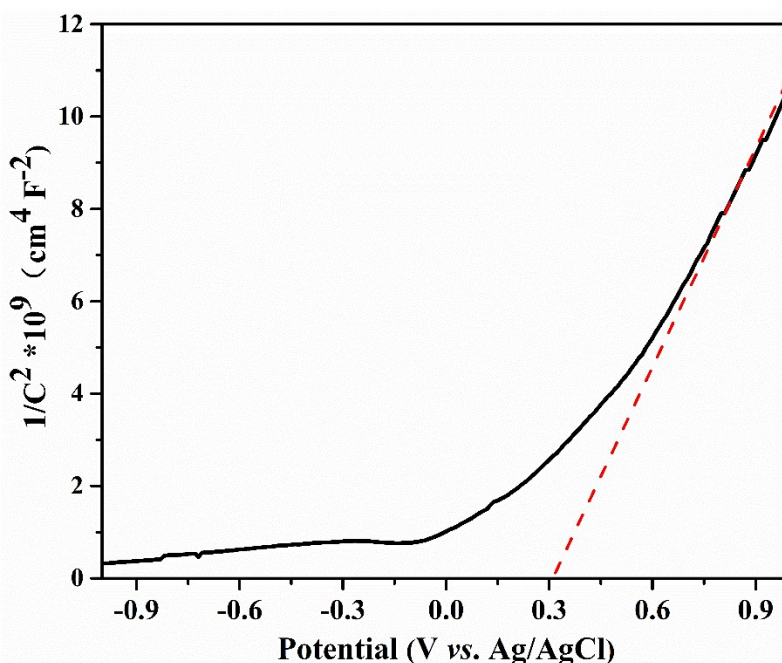

Figure.S1. Mott-Schottky plots of WO<sub>3</sub> NFs/W electrode measured in 0.1 mol L<sup>-1</sup> Na<sub>2</sub>SO<sub>4</sub> solution with a frequency of 1000 Hz and scan rate of 0.01 V·s<sup>-1</sup>.

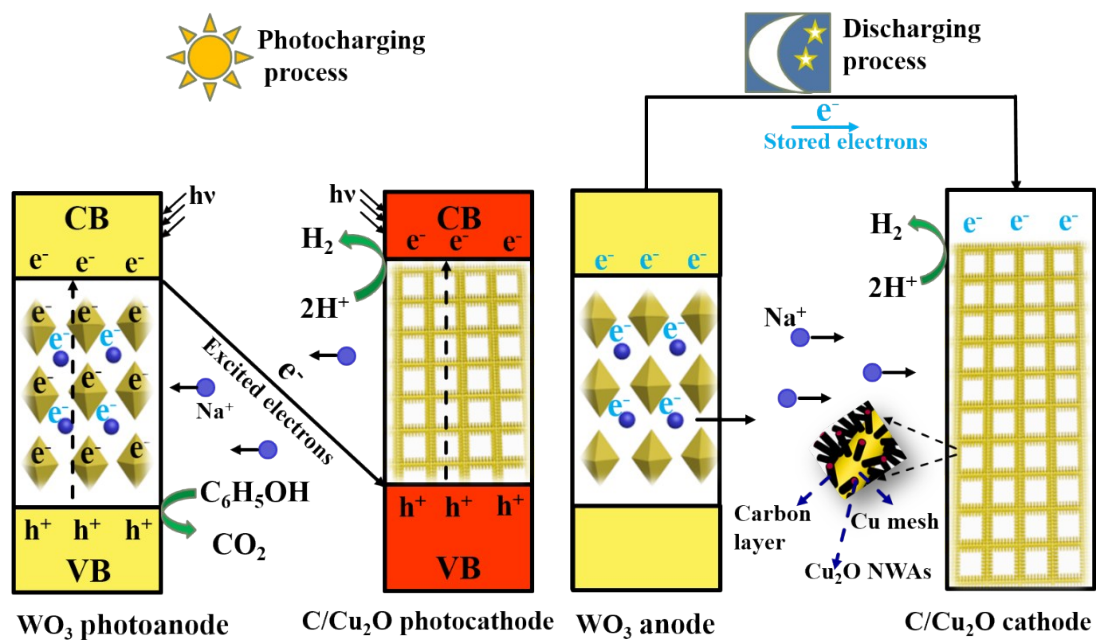

Fig.S2.The working mode diagram of scPEWFC system for simultaneous pollutant removal and hydrogen production under the photocharging-discharging process.

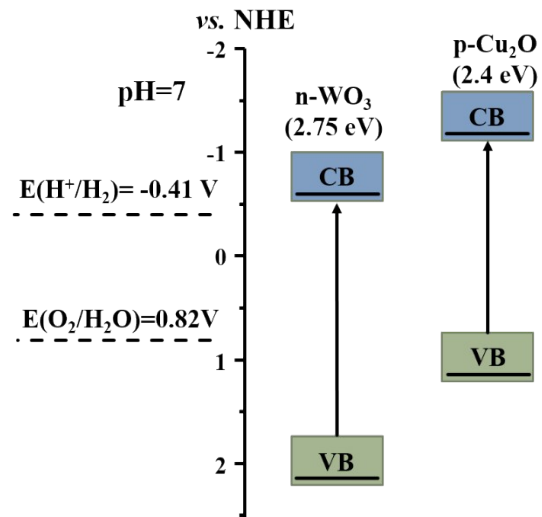

Fig. S3 The relative band positions for the WO<sub>3</sub> NFs-C/Cu<sub>2</sub>O NWAs visible-light response dual-photoelectrodes

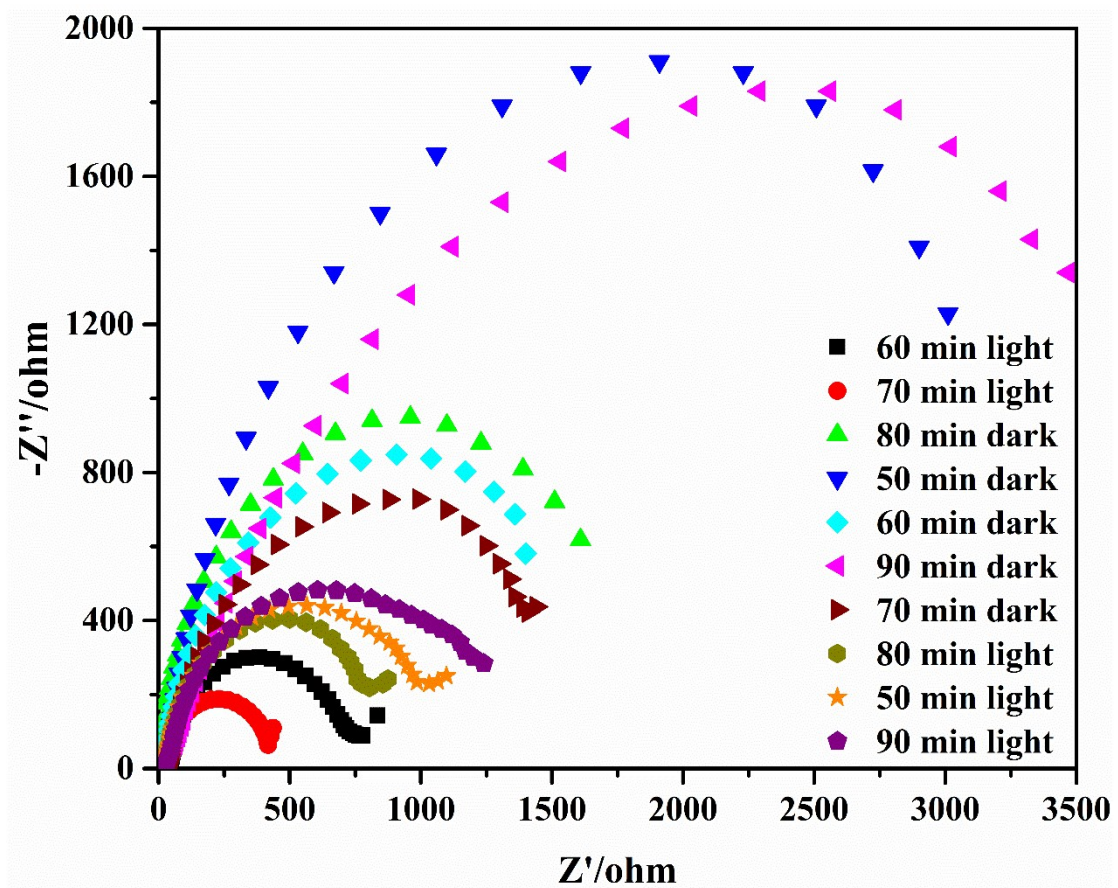

Figure.S4. The Nyquist curve of different anodizing time prepared  $\text{WO}_3$  NFs electrode by using the two-electrode system without any bias in the  $0.1 \text{ mol L}^{-1} \text{ Na}_2\text{SO}_4$  solution containing  $20 \text{ mg L}^{-1}$  phenol.

**Table S1.** The photoelectrochemical performance, TOC removal and hydrogen production of scPEWFC.

| <b>Parameters</b>                                   | <b>50min</b> | <b>60min</b> | <b>70min</b> | <b>80min</b> | <b>90min</b> |
|-----------------------------------------------------|--------------|--------------|--------------|--------------|--------------|
| $V_{OC}$ (V)                                        | 0.24         | 0.26         | 0.25         | 0.24         | 0.24         |
| $J_{SC}$ ( $\text{mA}\cdot\text{cm}^{-2}$ )         | 0.33         | 0.42         | 0.44         | 0.40         | 0.36         |
| $P_{max}$ ( $\text{mW}\cdot\text{cm}^{-2}$ )        | 0.011        | 0.014        | 0.015        | 0.013        | 0.011        |
| FF                                                  | 0.139        | 0.128        | 0.136        | 0.135        | 0.127        |
| TOC (%)                                             | 77.53        | 80.51        | 82.12        | 79.93        | 78.01        |
| $\text{H}_2$ ( $\mu\text{mol}\cdot\text{cm}^{-2}$ ) | 80.67        | 87.15        | 93.08        | 85.65        | 82.41        |

**Table S2.** The WO<sub>3</sub> NFs/W-C/Cu<sub>2</sub>O NWAs/Cu scPEWFC performance parameters in different concentrations of electrolyte solution.

| <b>Parameters</b>                             | <b>0.01mol L<sup>-1</sup></b> | <b>0.05 mol L<sup>-1</sup></b> | <b>0.1 mol L<sup>-1</sup></b> | <b>0.5 mol L<sup>-1</sup></b> |
|-----------------------------------------------|-------------------------------|--------------------------------|-------------------------------|-------------------------------|
| J <sub>SClight</sub> (mA cm <sup>-2</sup> )   | 0.482                         | 0.488                          | 0.523                         | 0.589                         |
| J <sub>SCdark</sub> (mA cm <sup>-2</sup> )    | 0.067                         | 0.075                          | 0.098                         | 0.080                         |
| H <sub>2 light</sub> (μmol cm <sup>-2</sup> ) | 78.97                         | 81.15                          | 85.58                         | 80.89                         |
| H <sub>2 dark</sub> (μmol cm <sup>-2</sup> )  | 6.23                          | 6.71                           | 7.50                          | 7.15                          |
